# Supplementary material
Source: Research Square preprint supplement (doi:10.21203/rs.3.rs-9054134/v1)
Supplement: Supplementary file 1 [file 5a1766953051da1f7e3d3ee0.docx]

**Telemental Health Care (TMHC): Reducing Barriers and Overcoming Stigma**

**Access Mental Health Care in Qatar**

**Semi-Structured Interview Protocol with Service Providers**

Service providers will be asked the following questions:

1. What kinds of challenges do you think individuals with mental health conditions commonly face? How might these challenges influence their ability to access mental health care services?
2. How would you describe the role of technology in mental health care? In what ways do you think it could affect access and the delivery of services? What are your thoughts on how technology might influence stigma related to mental health?
3. If you were to envision an effective TMHC program, what features or components would it include? What types of technology or communication methods would be most useful?
4. From your perspective, what potential risks or limitations might arise in the use of TMHC? How might the virtual format affect the quality or continuity of care?
5. Can you describe the current capacity of your clinic or organization in terms of providing mental health services through virtual platforms? What types of infrastructure, policies, or equipment are in place to support this?
6. What are your thoughts on the economic and time-related aspects of delivering TMHC? How might these factors impact the workload or productivity of providers?
7. In your view, what qualifications or competencies should mental health professionals possess to deliver services, including via TMHC, effectively?
8. What types of support systems or resources are currently available for individuals in Qatar experiencing mental health challenges?
9. How do you think individuals in Qatar might receive the use of TMHC? What factors might shape public acceptance or hesitation?
10. What considerations should be considered when providing TMHC to specific clinical populations in Qatar? How might these populations experience the benefits or limitations differently?
